# Supplementary material for: Analysis of Antarctic ozone trends from 1979 to 2023
Source: Copernicus journal article supplement (doi:10.5194/egusphere-2026-560), 2026-02-10
Supplement: Supplementary file [file egusphere-2026-560-AC2-supplement.pdf]

Review of “Analysis of Antarctic ozone trends from 1979 to 2023”.

This paper investigates Antarctic total column ozone trends over 1979–2023 with a focus on recent unusually low ozone years and on the contributions of the BDC on Antarctic TCO variability. The paper is well written and mostly clear. Some of the figures do need to be reworked in some fashion to be able to be readable, especially by colorblind people. Justification for some of methodology needs to be included and I would like to see discussion of some of the results expanded to increase the novel aspects of the paper (see specific comments below). Overall, I think the paper will expand our understanding and knowledge of the Antarctic ozone hole recovery and will be a good fit for publication after the authors address the comments listed below.

Thanks for your suggestion and detailed remark. This manuscript has addressed and answered each of the relevant questions and suggestions. We focused on changes in BDC to ozone, extended the time period of sensitivity experiments (2001-2023), and reanalyzed ozone changes in recent years (2020-2023). The modified words, expressions and sentences have been highlighted.

Thank you.

### **Major comments**

What is your justification for the time-period of your proxies used? Do your results show a difference if you use a 45 or 30 day lagged proxy instead of the Autumn-Spring accumulation for the eddy heat flux? Also, why is ENSO an instantaneous proxy? ENSO will affect tropospheric wave propagation which will likely take time to propagate down from the upper stratosphere. Does your ENSO proxy change the outcome if it is lagged?

Thank for your suggestion.

(1) What is your justification for the time-period of your proxies used?

Our proxies is based on the descriptions of weber (2018,2022) and Toro et al. (2017) and has been verified.

“Other terms used include QBO, 11-year solar cycle, ENSO, Antarctic Oscillation (AAO), BDC, stratospheric aerosol optical depth (SAOD) (Weber et al., 2018, 2022; Toro A et al., 2017)” (L143-144)

“Toro A, R., Araya, C., Labra O, F., Morales, L., Morales, R. G., and Leiva G, M. A.: Trend and recovery of the total ozone column in South America and Antarctica, *Clim. Dyn.*, 49, 3735-3752, <https://doi.org/10.1007/s00382-017-3540-1>, 2017.” (L525-526)

(2) Do your results show a difference if you use a 45 or 30 day lagged proxy instead of the Autumn-Spring accumulation for the eddy heat flux?

The MLR that includes the Autumn-Spring accumulation of eddy heat flux will better reproduce the long-term ozone changes over Antarctic.

“The dominant role of BDC can be explained by its transport of ozone from the tropics to high latitudes, with ozone accumulation reaching a maximum at mid to high latitudes from May to September and the efficiency of transport depends on the strength of BDC (Weber et al., 2011; Fioletov et al., 2023).” (L256-258)

So we think that the Autumn-Spring accumulation of eddy heat flux would provide a better description of the BDC changes.

(3) Also, why is ENSO an instantaneous proxy? Does your ENSO proxy change the outcome if it is lagged?

Thank for your suggestion. We have found that different lag times of ENSO have little impact on the results of the MLR. So we keep our MLR the same as the ENSO proxy described by weber (2018,2022) and Toro et al. (2017).

“Other terms used include QBO, 11-year solar cycle, ENSO, Antarctic Oscillation (AAO), BDC, stratospheric aerosol optical depth (SAOD) (Weber et al., 2018, 2022; Toro A et al., 2017)” (L143-144)

“In the MLR, AAO and BDC are represented by the mean of the autumn-to-spring accumulation, while other proxies use the monthly mean time series for monthly analyses and annual mean time series for annual analyses with no time lags.” (L175-177)

Thank you.

Line 178, Table 3 and throughout. How much does this change if you just use 2000–2023 instead of 2001–2023? Other recent studies I have seen (including references cited in the paper) use 2000 as the starting point of ozone recovery (Steinbrech et al., 2017 Godin-Beekmann, etc.). What you have done is not necessarily wrong and it might not really change things, but some discussion on this somewhere in the paper is warranted. How important is end-point noise here?

Thank for your suggestion. We have added this as follows.

“We also found that choosing the turnaround year for the overall ozone trend (e.g., 2000 vs 2001) has little impact on the trajectory (Zambri et al., 2021; Kessenich et al., 2023).” (L153-154)

“Zambri, B., Solomon, S., Thompson, D. W., and Fu, Q.: Emergence of Southern Hemisphere stratospheric circulation changes in response to ozone recovery, *Nat. Geosci.*, 14, 638-644, <https://doi.org/10.1038/s41561-021-00803-3>, 2021.” (L553-554)

Thank you.

In regards to modelling sections on the influence of the BDC. Have you looked into other potential conclusions here? Are there differences in the trends between the 2002 and 2006 years (EXP1 and EXP2)? If so what is causing them? Why is this analysis limited to only 10 years when the rest of the paper ends in 2023?

Thank for your suggestion.

(1) Are there differences in the trends between the 2002 and 2006 years (EXP1 and EXP2)?

We have added this as follows.

“Despite Antarctic ozone trends showing a decline during 2001-2023 in the annual mean and October, both EXP1 and EXP2 exhibited positive trends after controlling for BDC intensity, with notable consistency between the two experiments.” (L304-306)

(2) Why is this analysis limited to only 10 years when the rest of the paper ends in 2023?

Thank you for pointing this out. We have extended the sensitivity experiment time and mainly analyzed the changes from 2020 to 2023 (see Figure 7-9 and Section 5).

“TCO values dropped to approximately 150 DU in October-November during 2020-2022, significantly lower than in most years of the 2001-2019 period. ... Nevertheless, ozone levels in recent years (2020-2023) are significantly elevated compared with most of the past two decades.” (L318-323)

“Figure 9a shows the monthly mean temperature at 50 hPa from 2001 to 2023. The cooler temperatures in the spring and winter from 2020 to 2022 were associated with the persistently low ozone values. ... The higher springtime temperature and EHF in 2023, compared with the springs of 2020-2022, contributed to the elevated ozone concentrations (Fig. 8a).” (L329-334)

Thank you.

Please check the colorblind friendliness of your figures. There are a lot of separate lines, many of which are hard to distinguish (especially figure 5). I suggest reworking Figures 5, 8, and 9 to be more readable and to focus more on the conclusions you are trying to make. For example, using filled ranges with some key years overplotted to highlight specific conclusions could be one option.

Thank you for pointing this out. We have deleted the Figure 5 and revised the Figure 7-9. We have adjusted the line colors of the Figure 8-9.

Thank you.

### **Specific comments**

Line 18-21. Please add in conclusions of the recent 2020-2023 years impact on ozone variability here too?

Thank for your suggestion. We have added this as follows.

“For the 2001-2019 period, TCO showed signs of recovery, while the magnitude of the October trend shifted to -1.5 DU/yr over the extended 2001-2023 period. ... TCO exhibited a positive correlation with the estimated BDC contribution throughout the 2001-2023 period.” (L27-30)

Thank you.

Line 53. Wang et al., (2025) may be an important reference missing here.

Yes, you are right. The corresponding reference has been added.

“... long-lasting ozone holes (Kessenich et al., 2023; Wang et al., 2025).” (L56)

“Wang, P., Solomon, S., Santer, B. D., Kinnison, D. E., Fu, Q., Stone, K. A., Zhang, J., Manney, G. L., and Millán, L. F.: Fingerprinting the recovery of Antarctic ozone, *Nature*, 639, 646-651, <https://doi.org/10.1038/s41586-025-08640-9>, 2025.” (L532-533)

Thank you.

Line 64. The references on wildfire don't talk about ozone depletion? There are other references that are likely more relevant here: Santee et al., (2022); Bernath et al., (2022); Solomon et al., (2023); Stone et al., (2025); Bruhl et al. (2025), etc.

Yes, you are right. The corresponding reference has been added.

“such as the 2019-2020 Australian fires, (Santee et al., 2022; Bernath et al., 2022; Solomon et al., 2023; Brühl et al., 2025).” (L67)

“Santee, M. L., Lambert, A., Manney, G. L., Livesey, N. J., Froidevaux, L., Neu, J. L., Schwartz, M., Millán, L., Werner, F., and Read, W. G.: Prolonged and pervasive perturbations in the composition of the Southern Hemisphere midlatitude lower stratosphere from the Australian New Year's fires, *Geophys. Res. Lett.*, 49, e2021GL096270, <https://doi.org/10.1029/2021gl096270>, 2022.” (L49-500)

“Solomon, S., Stone, K., Yu, P., Murphy, D., Kinnison, D., Ravishankara, A., and Wang, P.: Chlorine activation and enhanced ozone depletion induced by wildfire aerosol, *Nature*, 615, 259-264, <https://doi.org/10.1038/s41586-022-05683-0>, 2023.” (L512-514)

“Bernath, P., Boone, C., and Crouse, J.: Wildfire smoke destroys stratospheric ozone, *Science*, 375, 1292-1295, <https://doi.org/10.1126/science.abm5611>, 2022.” (L396-397)

“Brühl, C., Kohl, M., and Lelieveld, J.: Radiative forcing and stratospheric ozone changes due to major forest fires and recent volcanic eruptions including Hunga Tonga, *Atmos. Chem. Phys.*, 25, 18697-18718, <https://doi.org/10.5194/acp-25-18697-2025>, 2025.” (L398-400)

Thank you.

Line 115-116. I suggest rewording this sentence as it is a little confusing as it stands: “TOMCAT is a three-dimensional chemical transport model (CTM) that simulates global data for stratospheric chemical elements and substances such as ozone based on consistent chemical equations”. By substances, do you mean aerosols, or VSLs, or just stratospheric trace gases in general? What do you mean by consistent chemical equations? You could just mention the source of the equation constants. I.e. JPL-xx.

Thank for your suggestion. We have revised and supplemented this as follows.

“TOMCAT is a three-dimensional chemical transport model (CTM) and is driven by the ERA5 reanalysis meteorological field provided by the ECMWF (Chipperfield, 2006). The model uses a detailed gas-phase stratospheric chemistry scheme, providing a detailed description of stratospheric chemistry including the reactions of the oxygen, nitrogen, hydrogen, chlorine and bromine elements.” (L121-124)

Thank you.

Line 129. I understand what you mean here in a general sense but in the case of ozone the long-term trend isn't really due to an unknown process?

Yes, we agree with you. We have revised it as follows.

“Ozone trends are generally estimated using MLR, which incorporates trend terms and also includes proxies for the known dynamical and chemical processes.” (L136-137)

Thank you.

Line 131. What does independent linear trend mean? From your equation 1 I assume you mean that you have two separate linear trends, but you may want to explain how this is different from PLT or why this technique is important to use here (or the benefits and flaws).

Thank for your suggestion. We have revised it as follows.

“The trend term is the only non-periodic term in the MLR, whereas other terms generally exhibit some form of periodic or peak. Changes in stratospheric ozone levels are driven by the combined influences of climate variability and ODS. Consequently, the net ozone trend need not strictly track EESC variations before and

after the ODS peak, and ILT will better represent the ozone changes caused by other non-periodic forcings.” (L140-143)

Thank you.

Line 134-135. I am confused by this sentence: “Not all aperiodic changes can be assumed to follow EESC, hence we employ ILT as the trend term of the MLR and ILT and all proxies match the entire period”. It sounds like you employ ILT as the trend term of ILT. I think you can split this into two sentences to avoid confusion.

Thank for your suggestion. We have revised it as follows.

“Consequently, the net ozone trend need not strictly track EESC variations before and after the ODS peak, and ILT will better represent the ozone changes caused by other non-periodic forcings.” (L142-143)

Thank you.

Line 149. “To account for the effect of QBO phases and strength on ozone”. Do you mean: To account for the effect of the QBO phase on ozone variability?

Yes, you are right. We have modified it as follows.

“To account for the effect of QBO phases and strength on ozone” has been modified to “To account for the effect of the QBO phase on ozone variability” (L163)

Thank you.

Line 150-153. I think you should change to “stratospheric aerosol optical depth” like you have in Table 2 and change the acronym to SAOD to make sure you are clear that you are considering stratospheric aerosols only.

Thank for your suggestion. “AOD” has been modified to “SAOD”. And the corresponding expressions in the whole manuscript have been modified. (L144, L147, L164, L169, L260, L351)

Thank you.

Line 159. “Are you really using AAO and ENSO as proxies for long term ozone change? You mention in the previous sentence that ENSO is related to early or late breakup of the polar vortex which isn’t really long term ozone change.

Thank for your suggestion. We have revised and added it as follows.

“Sea surface temperature (SST) trends modulate Antarctic stratospheric ozone recovery (Hu et al., 2025).” (L172)

“Hu, Y., Tian, W., Zhang, J., Wang, Z., Li, D., and Yang, Q.: Recent sea surface temperature trends hinder Antarctic stratospheric ozone recovery, *Commun. Earth Environ.*, <https://doi.org/10.1038/s43247-025-03042-1>, 2025.” (L464-465)

Thank you.

Line 173. I assume these are linear trends from the MLR and not standalone linear trends? I think you mention it is from MLR in Table 3 but might be best to say this here too.

Thank you for pointing this out. We have revised the title of Table 3.

“Linear trends (DU/yr) of TCO” has been modified to “Table 3. Independent linear trends (DU/yr) of TCO” (L196)

Thank you.

Line 174. “In recent years”. I suggest giving the actual year range here.

Thank for your suggestion. “In recent years” has been modified to “during 2020-2023”. And the corresponding expressions in the whole manuscript have been modified. (L192, L195, L351)

Thank you.

Line 209. “Among them, the MLR of TOMCAT is the largest, explaining 91 % of the variance in the time series, indicating strong reproduction of observed long-term ozone variability.” This sentence is confusing. Among what? All panels of Figure 3 show TOMCAT only, and 91% of the variance is only for September. Also, I understand it is specified dynamics, but TOMCAT is a model, not observations. Please reword.

Thank you for pointing this out. We have modified and added it as follows.

“observed” has been modified to “simulated”. (L230)

“Table 3 indicates that the independent variables in the MLR models effectively reproduce the ozone time series for each dataset. The independent variables in the MLR can explain about 85 % of the variance in the interannual time series. Among these datasets, the MLR of TOMCAT accurately reproduced of simulated long-term

ozone variability, explaining 91% of the variance in the September time series.”  
(L228-231)

Thank you.

Line 249-250. I don't think you can conclude that AOD dominates interannual variability here considering there is really only one event (Pinatubo) that is larger than any other proxies interannual variability.

Yes, you are right. We have revised it as follows.

“After a volcanic eruption, SAOD will remain high in the stratosphere for a limited period. SAOD exerted a significant influence on Antarctic ozone following the El Chichón (1982) and Pinatubo (1991) volcanic eruptions.” (L260-262)

Thank you.

Line 250. Is the 5.5% term referring to the maximum change in a given year or the explained variance?

Thank you for pointing this out. We have added explanations about peak contributions (see Eq. (2)).

“To quantitatively describe the contribution of different factors on the ozone, we calculated the peak contribution of the proxies to ozone and its rate of change. The contribution equation is shown in Eq. (2):

$$\Delta \text{TCO}[\%] = \frac{\max(X(t)) - \min(X(t))}{\text{mean}(y(t))} \times 100\% \quad (2)$$

where  $\max(X(t)) - \min(X(t))$  represents the peak contribution,  $X(t)$  is the contribution of different factors to ozone during the period 1979-2023, and  $y(t)$  is the TCO time series.” (L155-161)

Thank you.

Line 250-253: “The dominant role of BDC can be explained by its transport of ozone from the tropics to high latitudes, with ozone accumulation reaching a maximum at mid to high latitudes from May to September. During winter, ozone is transported from mid latitudes to the polar regions in spring, and the efficiency of this transport depends on the strength of BDC” These sentences seem to be explaining the same thing? Please refine.

Yes, we agree with you. We have revised it as follows.

“The dominant role of BDC can be explained by its transport of ozone from the tropics to high latitudes, with ozone accumulation reaching a maximum at mid to high latitudes from May to September and the efficiency of transport depends on the strength of BDC (Weber et al., 2011; Fioletov et al., 2023).” (L257-258)

Thank you.

Line 267. “Typical years”. I suggest removing typical as it may seem you are referring to normal years instead of more extreme BDC years.

Yes, we agree with you. We have deleted it (Typical years).

“The selection of 2002 and 2006 was guided by interannual variation of ozone” (L288)

Thank you.

Line 280-284. I don't understand the reasoning here. I think this can be expanded a little. Where are the numbers 15% and 52% coming from? Also, the extremes in Figure 7 (blue and red lines) now show the linear trends predominantly dominated by ODS recovery similar to what was done by Solomon et al., (2016). Have you looked into other results here? Are there differences in the trends between the 2002 and 2006 years? If so what is causing them?

(1) Where are the numbers 15% and 52% coming from?

Thank you for pointing this out. We have added explanations about peak contributions (see Eq. (2)).

“To quantitatively describe the contribution of different factors on the ozone, we calculated the peak contribution of the proxies to ozone and its rate of change. The contribution equation is shown in Eq. (2):

$$\Delta \text{TCO}[\%] = \frac{\max(X(t)) - \min(X(t))}{\text{mean}(y(t))} \times 100\% \quad (2)$$

where  $\max(X(t)) - \min(X(t))$  represents the peak contribution,  $X(t)$  is the contribution of different factors to ozone during the period 1979-2023, and  $y(t)$  is the TCO time series.” (L155-161)

(2) Are there differences in the trends between the 2002 and 2006 years? If so what is

causing them?

Thank for your suggestion. We have extended the sensitivity experiment time and redrawn the Figure 7.

“Despite Antarctic ozone trends showing a decline during 2001-2023 in the annual mean and October, both EXP1 and EXP2 exhibited positive trends after controlling for BDC intensity, with notable consistency between the two experiments.” (L304-306)

Thank you.

Line 325. Maybe self-evident, but I suggest mentioning that this change in trend sign is due to large ozone holes later in the period (after 2019).

Yes, we agree with you. We have revised it as follows.

“In 2001-2019, annual ozone showed signs of recovery, while the persistent low ozone values from 2020 to 2023 resulting in the annual ozone change shifted downward at -0.4 (1.1) DU/yr during 2001-2023.” (L341-343)

Thank you.

Line 326. “explaining about 67-91 %”. Is the large range due different months? 65% in September and 91% in October?

Thank you for pointing this out. We have revised it as follows.

“The MLR reproduces using multiple datasets effectively capturing the long-term ozone change over Antarctic. Among these, the MLR based on the TOMCAT model performed better, explaining 91% of the variance in the time series in September.” (L344-346)

Thank you.

Figure 1 title. Correlation between proxy -> correlation between proxies

Thank for your suggestion. We have revised the Figure 1.

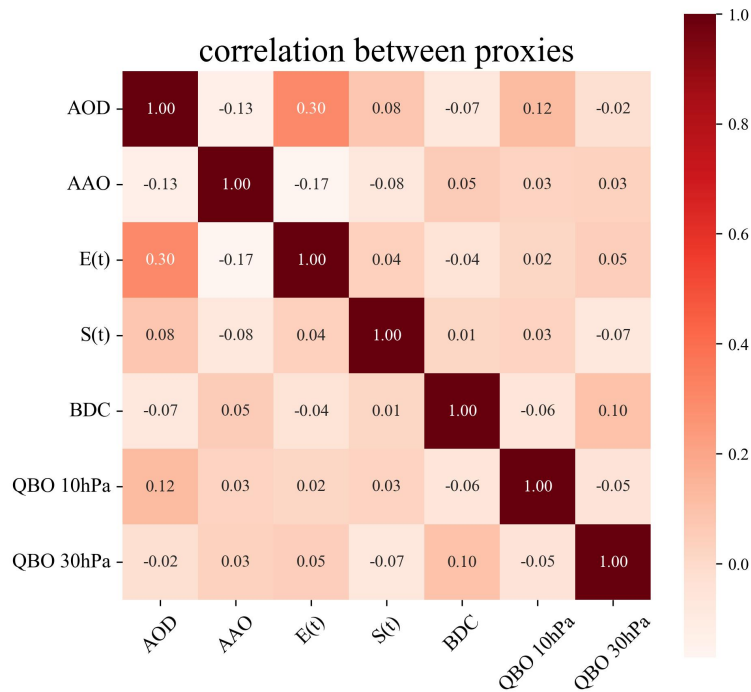

Thank you.

Figure 2. I think you can keep the same x-axis limits for panel d to make it easier to compare with the other datasets. Also, y-axis limits should be the same here.

Thank for your suggestion. We have revised the Figure 2.

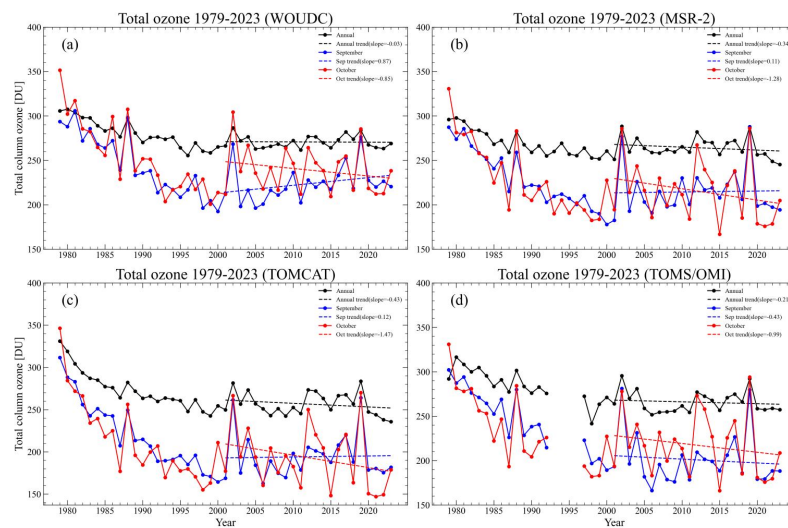

Thank you.

Figure 4. Is there any particular reason for the dates shown on the x-axis? I like the vertical dashed line separating the months but the 20-day tick mark is unusual?

Thank you for pointing this out. We have revised the Figure 4.

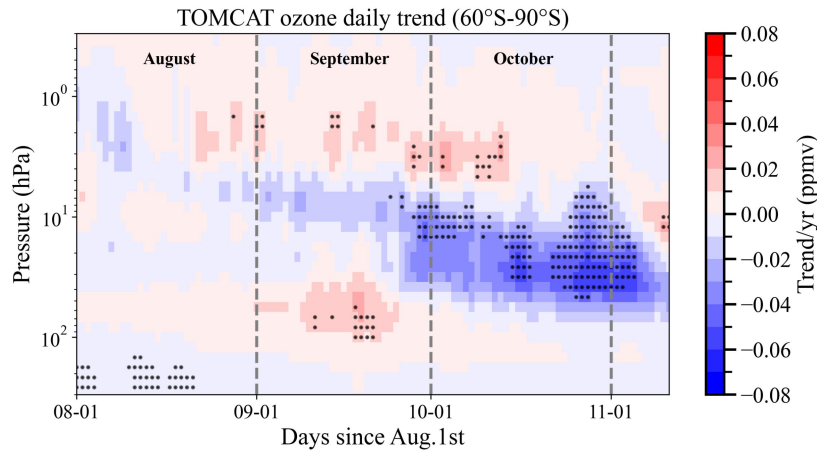

Thank you.

Figure 3. What does OLS mean in the legend? Ordinary Least Squares maybe? I can't find this acronym throughout the text and am confused why ordinary least squares would be used here (it that is indeed the case).

Sorry for my carelessness. We have revised the Figure 3.

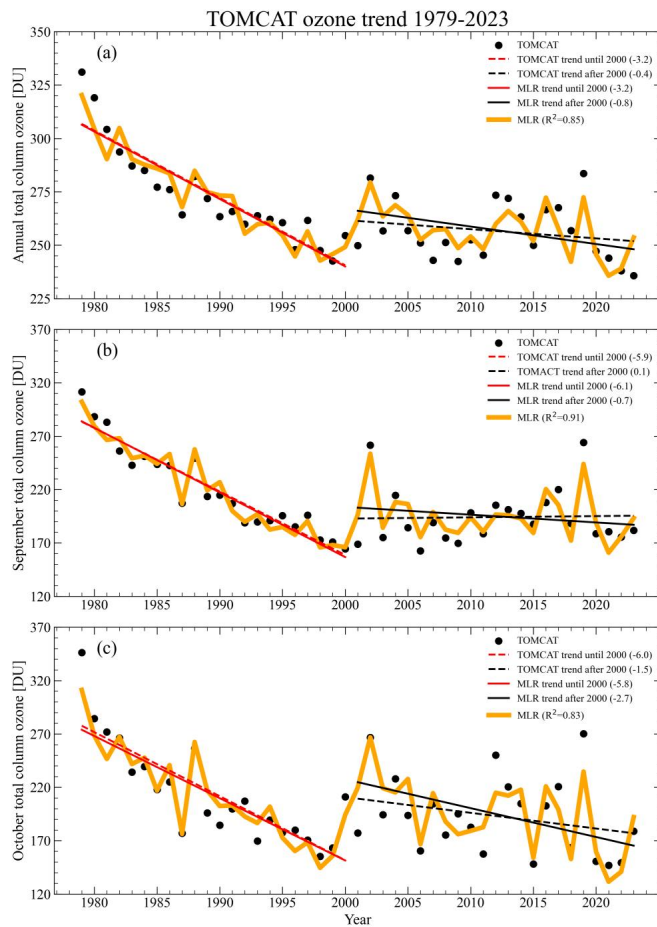

Thank you.

Figure 5. Please restructure this figure. It is very hard to distinguish between lines here. It will be virtually impossible for a colorblind person. If there is a supplement, this figure could be a good fit considering that most information is captured in Figure 6.

Yes, you are right. We have deleted Figure 5 and adjusted the line colors of the subsequent figures (Figure 8-9).

Thank you.

Figure 7-9. It looks like these figures have stretched aspect ratios? I assume it will be fixed later. Please check.

Thank you for pointing this out. We have revised the Figure 7-9.

Thank you.

Figures 8 and 9 are going are also going to be hard for colorblind readers. I suggest reworking. Maybe using a filled range with only extremes and notable years overplotted. (I understand that it is not an easy ask).

Thank you for pointing this out. We have revised the Figure 8-9 and mainly analyzed the changes from 2020 to 2023.

“TCO values dropped to approximately 150 DU in October-November during 2020-2022, significantly lower than in most years of the 2001-2019 period. ... Nevertheless, ozone levels in recent years (2020-2023) are significantly elevated compared with most of the past two decades.” (L318-323)

“Figure 9a shows the monthly mean temperature at 50 hPa from 2001 to 2023. The cooler temperatures in the spring and winter from 2020 to 2022 were associated with the persistently low ozone values. ... The higher springtime temperature and EHF in 2023, compared with the springs of 2020-2022, contributed to the elevated ozone concentrations (Fig. 8a).” (L329-334)

Thank you.

Figure 9. I am confused why this analysis only goes to 2009 in contrast to the rest of the paper which extends to 2023?

Thank you for pointing this out. We have extended the sensitivity experiment time (2001-2023) and revised the Figure 9.

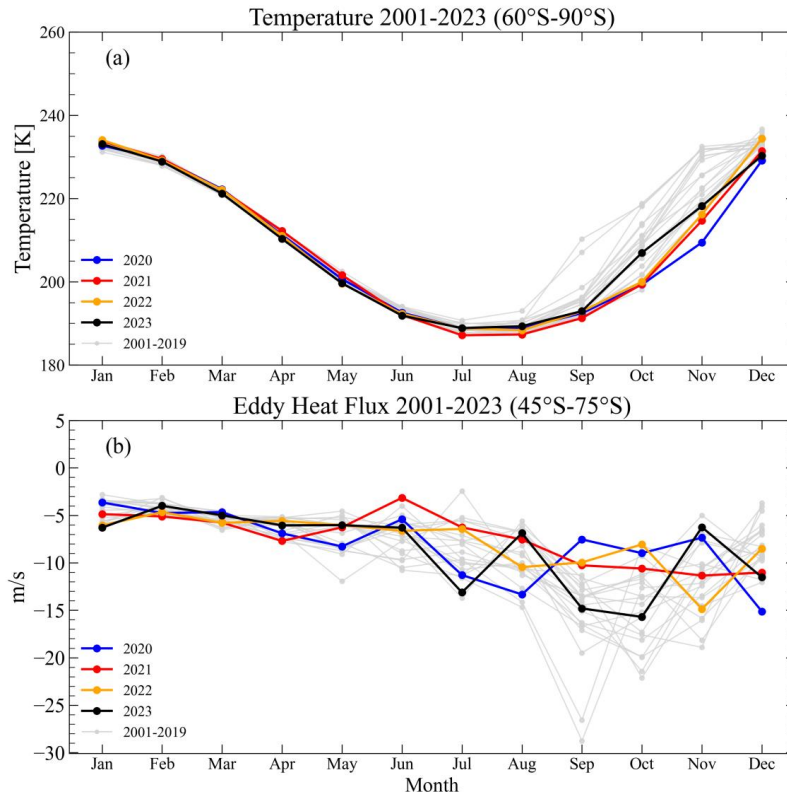

Thank you.

### Technical corrections

Line 109. Total ozone column – TCO for consistency.

Thank for your suggestion. “Total ozone column” has been modified to “TCO” (L114)

Thank you.

Line 133. “changes in the ODS” -> “changes in ODS”

Thank for your suggestion. “the ODS” has been modified to “ODS” (L141)

Thank you.

Line 154. “use Bremen” to “use the Bremen”

Thank you for pointing this out. “use Bremen” has been modified to “use the Bremen” (L168)

Thank you.

Line 177. “2001- 2023”. Remove space and use endash.

Sorry for my carelessness. We have removed space.

Thank you.

Line 207. “Explaining” -> “Explain”

Thank you for pointing this out. “Explaining” has been modified to “Explain” (L229)

Thank you.

Line 254. “of BDC” -> “of the BDC”

Thank you for pointing this out. “of BDC” has been modified to “of the BDC” (L259)

Thank you.

Line 255 “peak rate” -> “the peak rate”

Thank you for pointing this out. “peak rate” has been modified to “the peak rate” (L259)

Thank you.

Table 1. EAR5 -> ERA5 (I assume).

Sorry for my carelessness. “EAR5” has been modified to “ERA5” (Table 1)

Thank you.

Line 260-261. “To investigate the role of BDC on Antarctic ozone” suggest changing to “To investigate this further”.

Thank for your suggestion. “To investigate the role of BDC on Antarctic ozone” has been modified to “To investigate this further” (L281)

Thank you.

Line 295. “The EXP1” -> “EXP1”

Thank for your suggestion. “The EXP1” has been modified to “EXP1” (L320)

Thank you.

## References

Wang, P., Solomon, S., Santer, B. D., Kinnison, D. E., Fu, Q., Stone, K. A., Zhang, J., Manney, G. L., and Millán, L. F.: Fingerprinting the recovery of Antarctic ozone, *Nature*, 639, 646–651, <https://doi.org/10.1038/s41586-025-08640-9>, 2025.

Santee, M. L., Lambert, A., Manney, G. L., Livesey, N. J., Froidevaux, L., Neu, J. L., Schwartz, M. J., Millán, L. F., Werner, F., Read, W. G., Park, M., Fuller, R. A., and Ward, B. M.: Prolonged and Pervasive Perturbations in the Composition of the Southern Hemisphere Midlatitude Lower Stratosphere From the Australian New

Year's Fires, *Geophysical Research Letters*, 49, 1–11, <https://doi.org/10.1029/2021gl096270>, 2022.

Bernath, P., Boone, C., and Crouse, J.: Wildfire smoke destroys stratospheric ozone, *Science*, 375, 1292–1295, <https://doi.org/10.1126/science.abm5611>, 2022.

Solomon, S., Stone, K., Yu, P., Murphy, D. M., Kinnison, D., Ravishankara, A. R., and Wang, P.: Chlorine activation and enhanced ozone depletion induced by wildfire aerosol, *Nature*, 615, 259–264, <https://doi.org/10.1038/s41586-022-05683-0>, 2023.

Stone, K., Solomon, S., Yu, P., Murphy, D. M., Kinnison, D., and Guan, J.: Two-years of stratospheric chemistry perturbations from the 2019/2020 Australian wildfire smoke, *Atmos. Chem. Phys.*, 25, 7683–7697, <https://doi.org/10.5194/acp-25-7683-2025>, 2025.

Brühl, C., Kohl, M., Lelieveld, J., Rieger, L., and Santee, M.: Radiative forcing and stratospheric ozone changes due to major forest fires and recent volcanic eruptions including Hunga Tonga, , <https://doi.org/10.5194/egusphere-egu25-3642>, 2025.

Solomon, S., Ivy, D. J., Kinnison, D., Mills, M. J., Neely, R. R., and Schmidt, A.: Emergence of healing in the Antarctic ozone layer, *Science*, 310, 307–310, <https://doi.org/10.1126/science.aae0061>, 2016.

[Thank for your suggestion. The corresponding reference has been added.](#)

[Thank you.](#)
